# Supplementary material for: Hydrothermal combined with electrodeposition construction of a stable Co9S8/Ni3S2@NiFe-LDH heterostructure electrocatalyst for overall water splitting
Source: Royal Society of Chemistry journal article supplement (doi:10.1039/d0se01805h), 2021-01-01
Supplement: d0se01805h1.pdf [file d0se01805h1.pdf]

# Hydrothermal combined with electrodeposition construction of stable $\text{Co}_9\text{S}_8/\text{Ni}_3\text{S}_2@\text{NiFe-LDH}$ heterostructure electrocatalyst for overall water splitting

Fu Liu, Xingzhong Guo\*, Yang Hou, Fan Wang, Chang Zou, Hui Yang

## Node S1: The characterization of CoMo and $\text{Ni}_3\text{S}_2/\text{NF}$ .

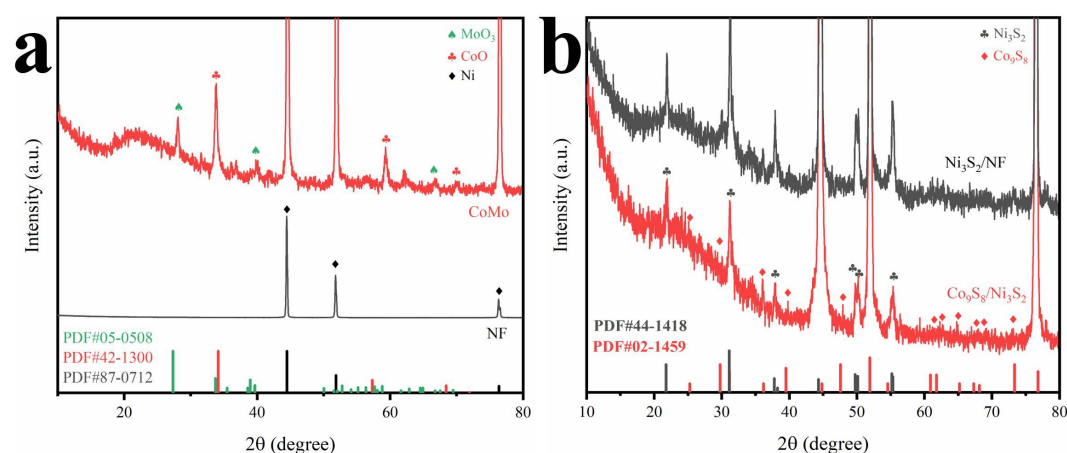

**Figure S1.** XRD patterns of the obtained samples: (a) nickel foam and CoMo, (b)  $\text{Ni}_3\text{S}_2/\text{NF}$  and  $\text{Co}_9\text{S}_8/\text{Ni}_3\text{S}_2$ .

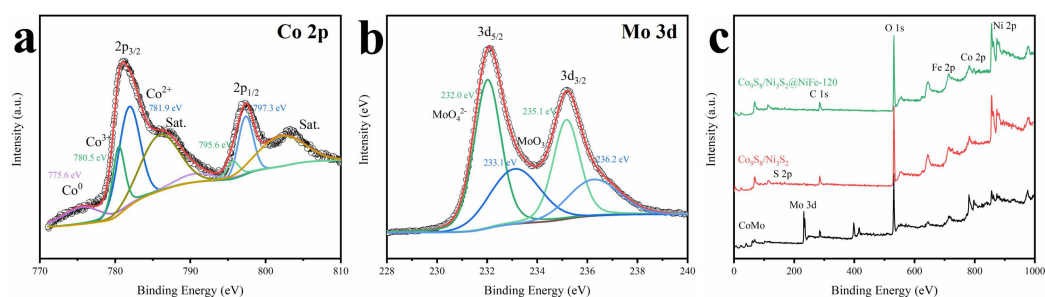

**Figure S2.** (a) Co 2p, (b) Mo 3d high resolution XPS spectra for CoMo, (c) The entire XPS spectra of CoMo,  $\text{Co}_9\text{S}_8/\text{Ni}_3\text{S}_2$ ,  $\text{Co}_9\text{S}_8/\text{Ni}_3\text{S}_2@\text{NiFe-120}$ .

Figure S2a shows the Co 2p spectrum, in which the peaks at 780.5 eV and 795.6 eV are attributed to  $2p_{3/2}$  and  $2p_{1/2}$  of  $\text{Co}^{3+}$ , the peaks at 781.9 eV and 797.3 eV are attributed to  $2p_{3/2}$  and  $2p_{1/2}$  of  $\text{Co}^{2+}$  in cobalt oxides, respectively. Besides, the  $\text{Co}^{3+}/\text{Co}^{2+}$  molar ratio is 0.45:1, and the peak at 775.6 eV indicates the existence of  $\text{Co}^0$ . For Mo 3d spectrum (Figure S2b), the  $3d_{5/2}$  and  $3d_{3/2}$  locate at 232.0 eV and 235.1 eV are assigned to Mo in  $\text{MoO}_4^{2-}$  which combined with Co to form  $\text{CoMoO}_4$ <sup>1</sup>, and 233.1 eV and 236.2 eV are assigned to  $\text{MoO}_3$ <sup>2</sup>. The above results are in agreement with XRD results (Figure S1a), confirming the formation of CoO and  $\text{MoO}_3$

compounds. In the entire spectra of CoMo, Co<sub>9</sub>S<sub>8</sub>/Ni<sub>3</sub>S<sub>2</sub> and Co<sub>9</sub>S<sub>8</sub>/Ni<sub>3</sub>S<sub>2</sub>@NiFe-120 (Figure S2c), it's easy to observe that Mo disappears in Co<sub>9</sub>S<sub>8</sub>/Ni<sub>3</sub>S<sub>2</sub> and Co<sub>9</sub>S<sub>8</sub>/Ni<sub>3</sub>S<sub>2</sub>@NiFe-120, which also coincides with the XRD results (Figure S2b).

## Node S2: The explanation and certification of the disappearance of Mo.

**Table S1.** Metal elements concentration detected by ICP-MS analysis.

| Samples                                                        | Co (mg·L <sup>-1</sup> ) | Mo (mg·L <sup>-1</sup> ) | Na (mg·L <sup>-1</sup> ) |
|----------------------------------------------------------------|--------------------------|--------------------------|--------------------------|
| CoMo                                                           | 392.22                   | 398.26                   | 0.991                    |
| Co <sub>9</sub> S <sub>8</sub> /Ni <sub>3</sub> S <sub>2</sub> | 195.76                   | 0.95                     | 0.993                    |
| Solution                                                       | 0.0125                   | 240.76                   | 2884.91                  |

The original ICP-MS results are shown in Table S1, in which we only detect the content of Co, Mo and Na. For CoMo, the content ratio of Co and Mo is about 1:1, while Na is considered as an impurity element reserved from Na<sub>2</sub>MoO<sub>4</sub>·2H<sub>2</sub>O or Na<sub>2</sub>S during the preparation. However, after the sulfuration, the content ratio of Co and Mo comes to almost 200:1, the concentration of Mo is near to that of Na, indicating that Mo was wiped off during the sulfuration. Furtherly, we also measured the ion concentration of the solution, in which the content of Mo greatly exceeded Co, proving that Mo almost distributed in solution. Besides, Na was from Na<sub>2</sub>S, thus possessed a high concentration. The possible reactions for Mo during the sulfuration are shown as follows:

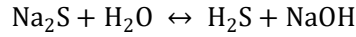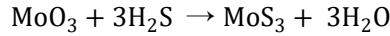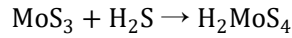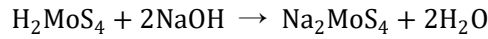

When Na<sub>2</sub>S is excessive, the generated MoS<sub>3</sub> can furtherly react with H<sub>2</sub>S during the hydrothermal process and finally dissolve in H<sub>2</sub>O in the form of Na<sub>2</sub>MoS<sub>4</sub>, resulting in the disappearance of Mo in samples. To certify the above reactions, we dropped 1 M hydrochloric acid (HCl) into the solution after sulfuration, based on the following reactions:

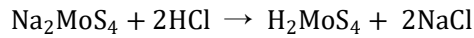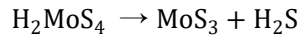

After the addition of HCl, an odor of H<sub>2</sub>S could be smelled, which might come from the excessive Na<sub>2</sub>S and the resultant H<sub>2</sub>MoS<sub>4</sub>, and brown sediments also appeared, as shown in Figure S3a. The sediments were washed and treated in Ar at 700 °C to remove sulfur in MoS<sub>3</sub> to form crystalline MoS<sub>2</sub> in the following reaction:

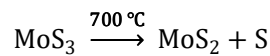

The XRD pattern shows the composition of the sediments before and after heat treatment in Figure S3b, c, respectively. The XRD pattern of sediments shows no obvious diffraction peaks, suggesting the amorphous phase, while after heat treatment, the sediments have peaks

corresponding to  $\text{MoS}_2$  (PDF#37-1492), proving the formation of  $\text{MoS}_3$  in sediments. The results prove the above discussion and explain the disappearance of Mo in samples.

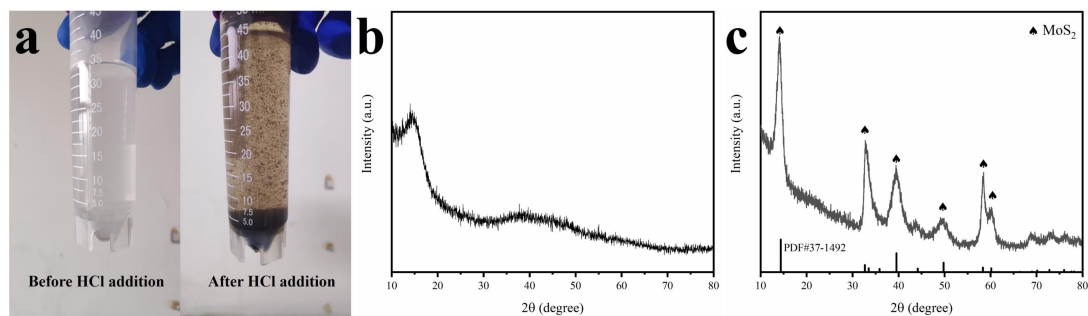

**Figure S3.** (a) Pictures of the solution obtained in hydrothermal procedure before and after HCl addition, XRD patterns of (b) sediments, (c) sediments after 700 °C heat treatment in Ar.

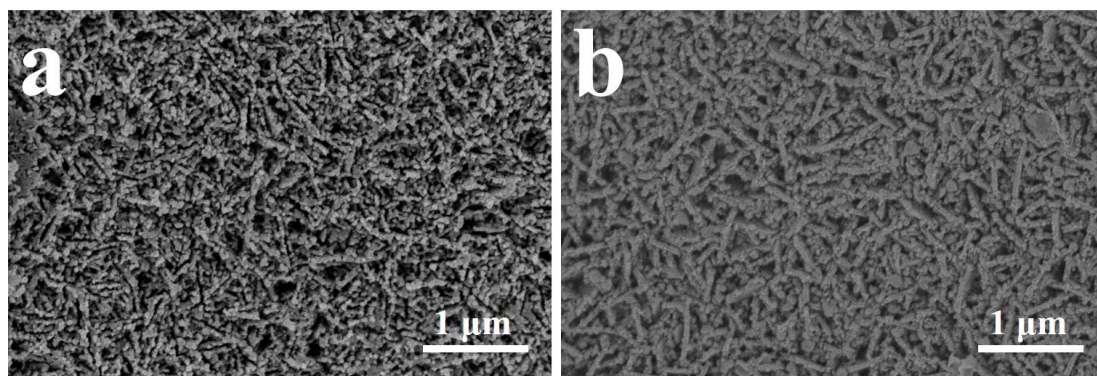

**Figure S4.** FESEM images of samples with different  $\text{Na}_2\text{S}$  dosage in hydrothermal procedure: (a) 0.023 g, (b) 0.005 g

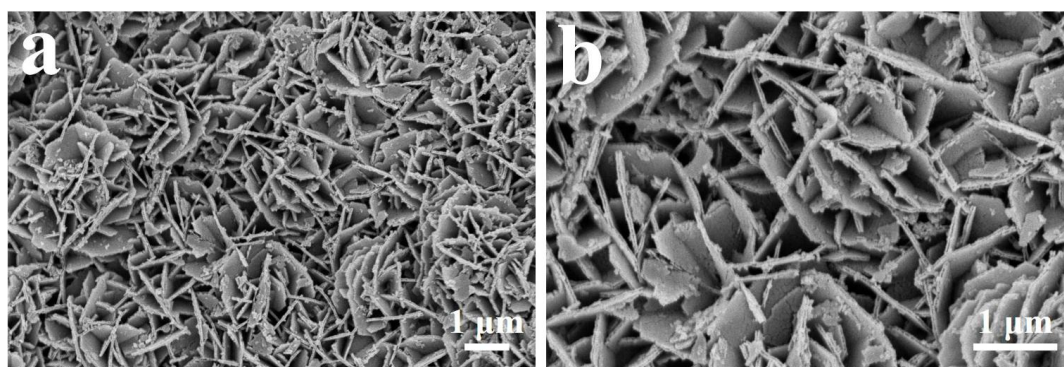

**Figure S5.** FESEM images of the sample with 0.234 g  $\text{Na}_2\text{S}$  dosage in hydrothermal procedure for 1 h

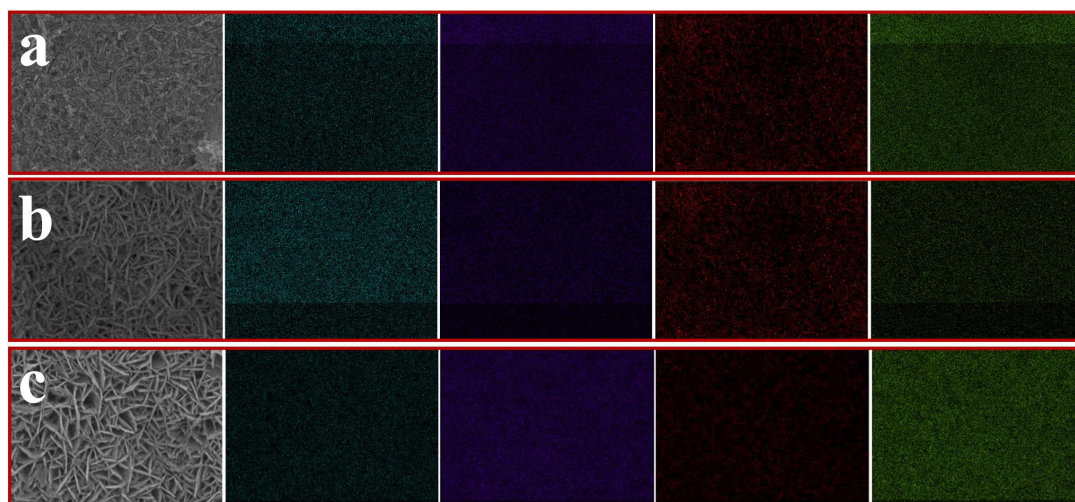

**Figure S6.** FESEM images and corresponding element mapping of different samples: (a) 0.023 g  $\text{Na}_2\text{S}$  dosage for 6h, (b) 0.005 g  $\text{Na}_2\text{S}$  dosage for 6h, (c) 0.234 g  $\text{Na}_2\text{S}$  dosage for 1h with the same  $\text{Na}_2\text{S}$  dosage in hydrothermal procedure for 1 h

**Table S2.** The element ratio of different samples after sulfuration obtained by EDS.

| Sample                                                  | Co (at%) | Mo (at%) | O (at%) | S (at%) |
|---------------------------------------------------------|----------|----------|---------|---------|
| Sample with 0.023 g $\text{Na}_2\text{S}$ dosage for 6h | 15.19    | 8.38     | 47.88   | 28.55   |
| Sample with 0.005 g $\text{Na}_2\text{S}$ dosage for 6h | 12.20    | 10.42    | 75.04   | 2.34    |
| Sample with 0.234 g $\text{Na}_2\text{S}$ dosage for 1h | 18.46    | 1.72     | 35.47   | 44.35   |

We furtherly conduct the sulfuration procedure using less  $\text{Na}_2\text{S}$  dosage, the FESEM images are shown in Figure S4. It indicates that little  $\text{Na}_2\text{S}$  can only react on the surface of CoMo nanosheets and is not able to change the spatial arrangement. Another sample with the same  $\text{Na}_2\text{S}$  dosage for 1 h hydrothermal procedure was also prepared and the FESEM images are shown in Figure S5, it's obvious that larger sheet size and space are obtained. The element distribution and ratio of the three samples obtained by EDS are shown in Figure S6 and Table S2, further confirming the effect of excessive  $\text{Na}_2\text{S}$  dosage.

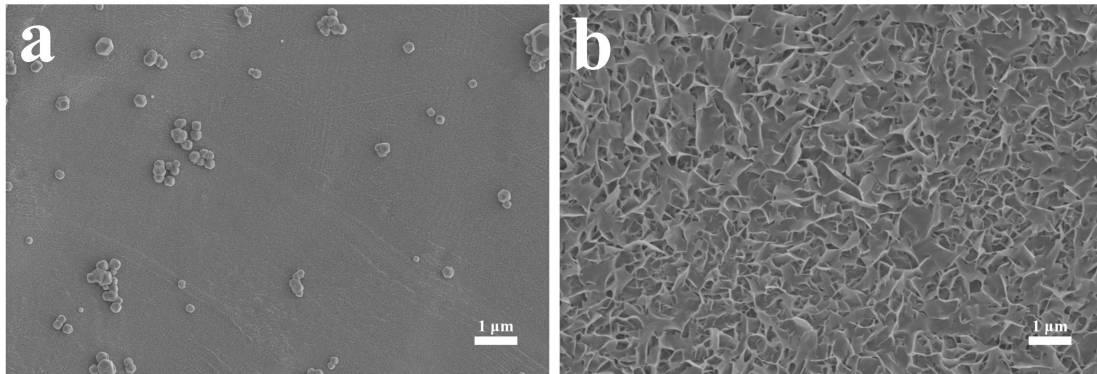

**Figure S7.** FESEM images of samples prepared using the same hydrothermal condition with only one precursor: (a)  $\text{Co}(\text{NO}_3)_2 \cdot 6\text{H}_2\text{O}$ , (b)  $\text{Na}_2\text{MoO}_4 \cdot 2\text{H}_2\text{O}$ .

As shown in Figure S5, merely using one raw material ( $\text{Co}(\text{NO}_3)_2 \cdot 6\text{H}_2\text{O}$  or  $\text{Na}_2\text{MoO}_4 \cdot 2\text{H}_2\text{O}$ ) cannot obtain the large-size sheets which can be used as substrates in electrodeposition.

Therefore, there was a recombination during the sulfuration process, resulting in larger sizes of nanosheets, moreover, benefiting from the reactions between  $\text{MoO}_3$  and  $\text{Na}_2\text{S}$ , the interspace of nanosheets became larger, the larger sizes and interspace were both beneficial to electrodeposition. In previous reports, the obtained  $\text{Co}_9\text{S}_8$  is often small sheets, such as Zhou *et al*<sup>3</sup>, Du *et al*<sup>4</sup> or nanowires, such as Du *et al*<sup>5</sup>, thus this may be an effective method to prepare large-size sulfides.

**Node S3: The characterizations of  $\text{Co}_9\text{S}_8/\text{Ni}_3\text{S}_2$ ,  $\text{Co}_9\text{S}_8/\text{Ni}_3\text{S}_2@\text{NiFe-60}$ ,  $\text{Co}_9\text{S}_8/\text{Ni}_3\text{S}_2@\text{NiFe-120}$  and  $\text{Co}_9\text{S}_8/\text{Ni}_3\text{S}_2@\text{NiFe-180}$ .**

**Table S3.** Metal element concentration detected by ICP-MS analysis for the solution with different element concentrations in electrodeposition.

| Ni/Fe ratio in solution | Ni ( $\text{mg}\cdot\text{L}^{-1}$ ) | Fe ( $\text{mg}\cdot\text{L}^{-1}$ ) | Ni ( $\text{mol}\cdot\text{L}^{-1}$ ) | Fe ( $\text{mol}\cdot\text{L}^{-1}$ ) |
|-------------------------|--------------------------------------|--------------------------------------|---------------------------------------|---------------------------------------|
| 1:1                     | 5.688                                | 7.512                                | 0.0969                                | 0.1345                                |
| 1:2                     | 2.203                                | 5.011                                | 0.0375                                | 0.0897                                |
| 2:1                     | 6.795                                | 5.171                                | 0.1158                                | 0.0926                                |

The  $pK_{\text{sp}}$  of  $\text{Ni}^{2+}$  is 15.26, while the  $pK_{\text{sp}}$  of  $\text{Fe}^{2+}$  is 16.31, indicating that  $\text{Fe}^{2+}$  is more liable to deposit during the electrodeposition procedure.

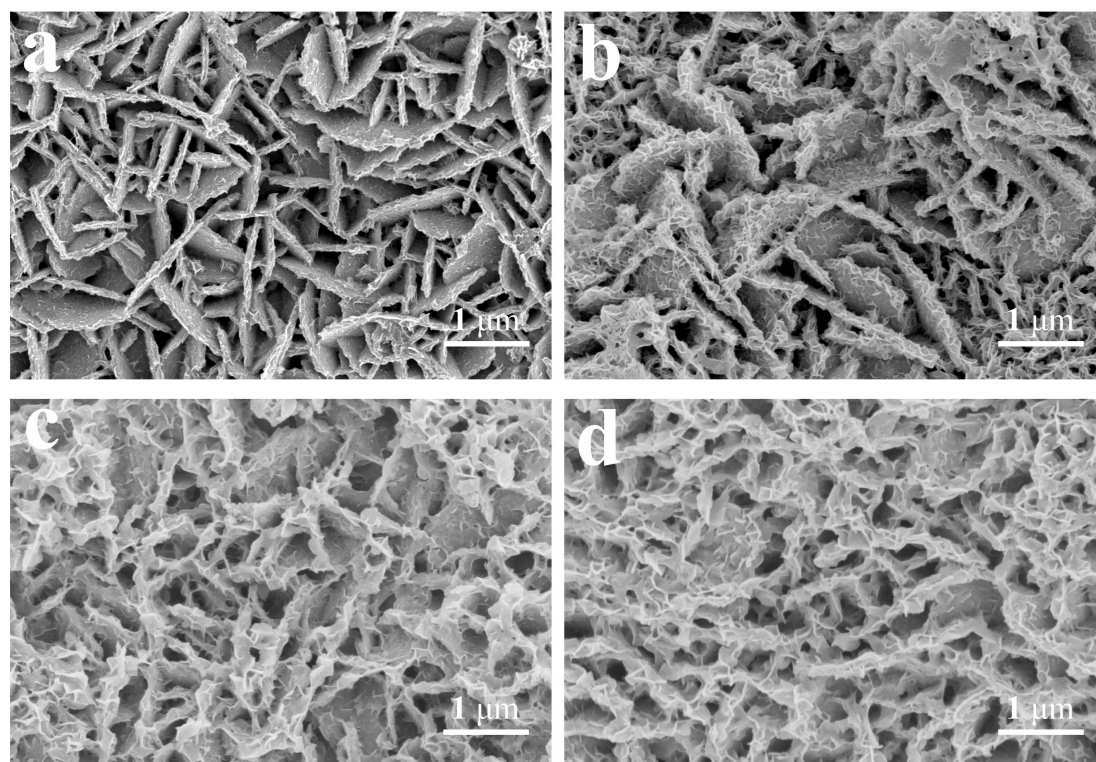

**Figure S8.** FESEM images of (a)  $\text{Co}_9\text{S}_8/\text{Ni}_3\text{S}_2$ , (b)  $\text{Co}_9\text{S}_8/\text{Ni}_3\text{S}_2@\text{NiFe-60}$ , (c)  $\text{Co}_9\text{S}_8/\text{Ni}_3\text{S}_2@\text{NiFe-120}$ , (d)  $\text{Co}_9\text{S}_8/\text{Ni}_3\text{S}_2@\text{NiFe-180}$ .

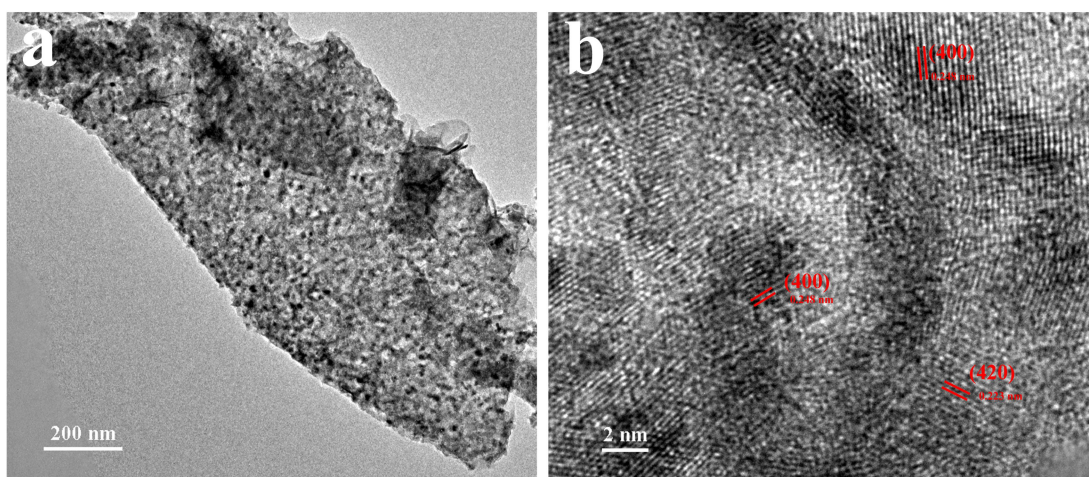

**Figure S9.** TEM images of  $\text{Co}_9\text{S}_8/\text{Ni}_3\text{S}_2$  sample: (a)  $\text{Co}_9\text{S}_8$  nanosheet, (b) high-resolution image of  $\text{Co}_9\text{S}_8$  nanosheet.

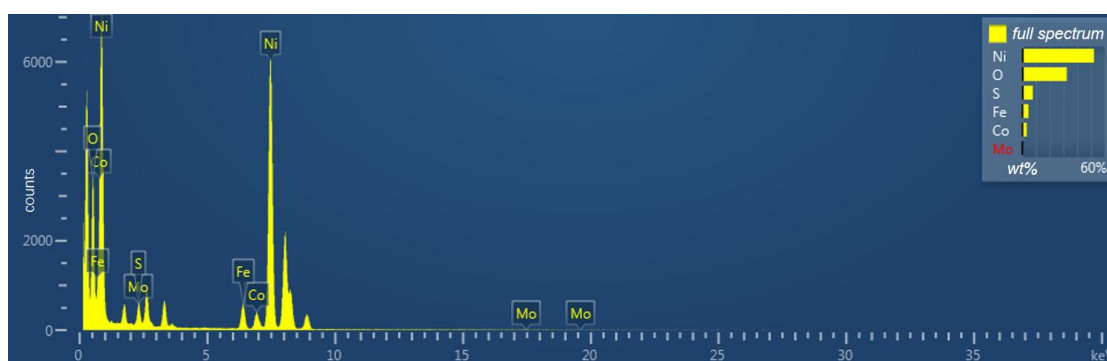

**Figure S10.** EDX spectrum and atomic mass distribution of  $\text{Co}_9\text{S}_8/\text{Ni}_3\text{S}_2@/\text{NiFe-120}$ .

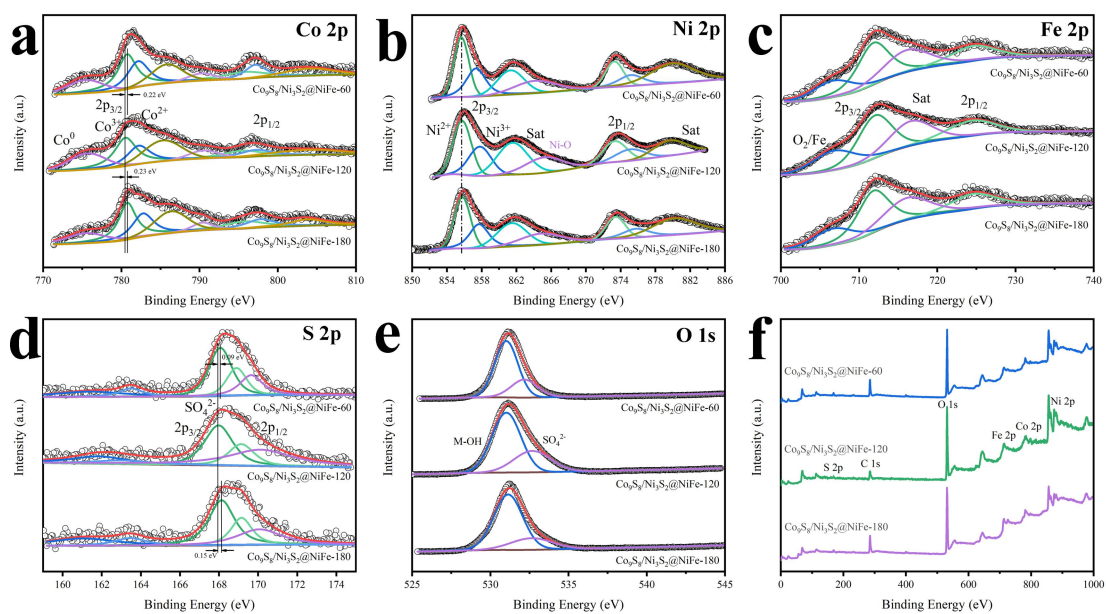

**Figure S11.** XPS spectra of  $\text{Co}_9\text{S}_8/\text{Ni}_3\text{S}_2@/\text{NiFe-60}$ ,  $\text{Co}_9\text{S}_8/\text{Ni}_3\text{S}_2@/\text{NiFe-120}$  and  $\text{Co}_9\text{S}_8/\text{Ni}_3\text{S}_2@/\text{NiFe-180}$ : (a) Co 2p, (b) Ni 2p, (c) Fe 2p, (d) S 2p, (e) O 1s, (f) entire region.



**Node S4: The measurements and characterizations of catalysts for water splitting.**

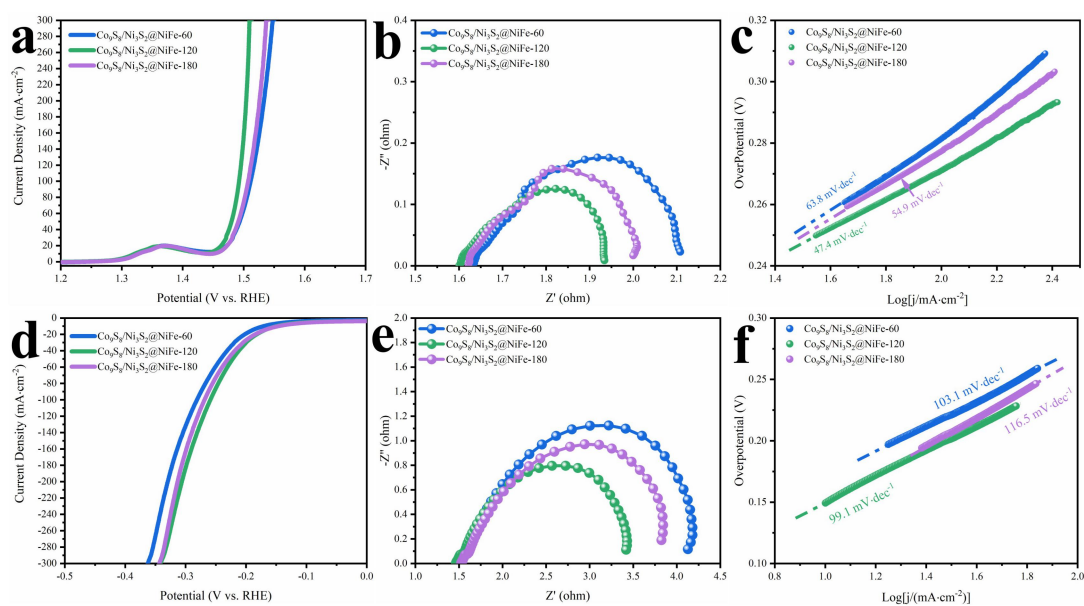

**Figure S12.** The electrocatalytic performance comparison of  $\text{Co}_9\text{S}_8/\text{Ni}_3\text{S}_2@/\text{NiFe-60}$ ,  $\text{Co}_9\text{S}_8/\text{Ni}_3\text{S}_2@/\text{NiFe-120}$  and  $\text{Co}_9\text{S}_8/\text{Ni}_3\text{S}_2@/\text{NiFe-180}$ , (a) LSV, (b) EIS, (c) Tafel plots for OER and (d) LSV, (e) EIS, (f) Tafel plots for HER.

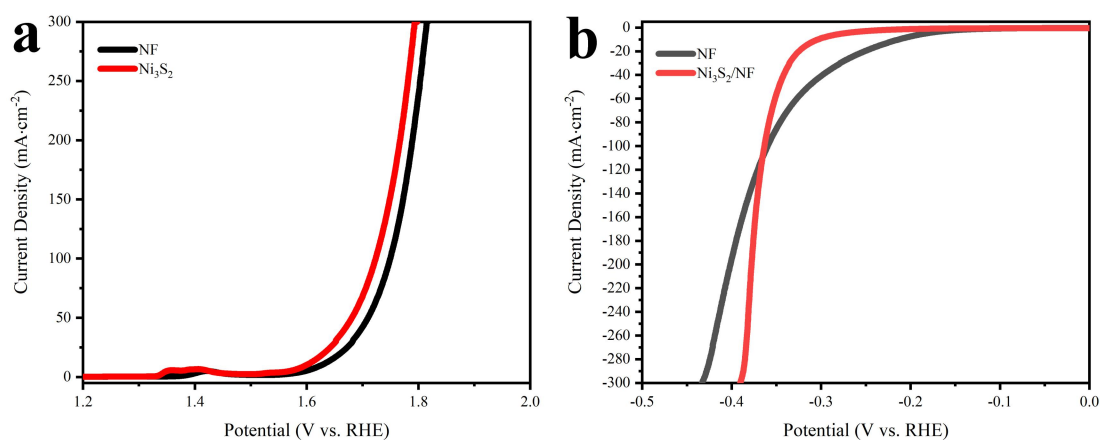

**Figure S13.** LSV curves of NF and  $\text{Ni}_3\text{S}_2/\text{NF}$  for (a) OER and (b) HER.

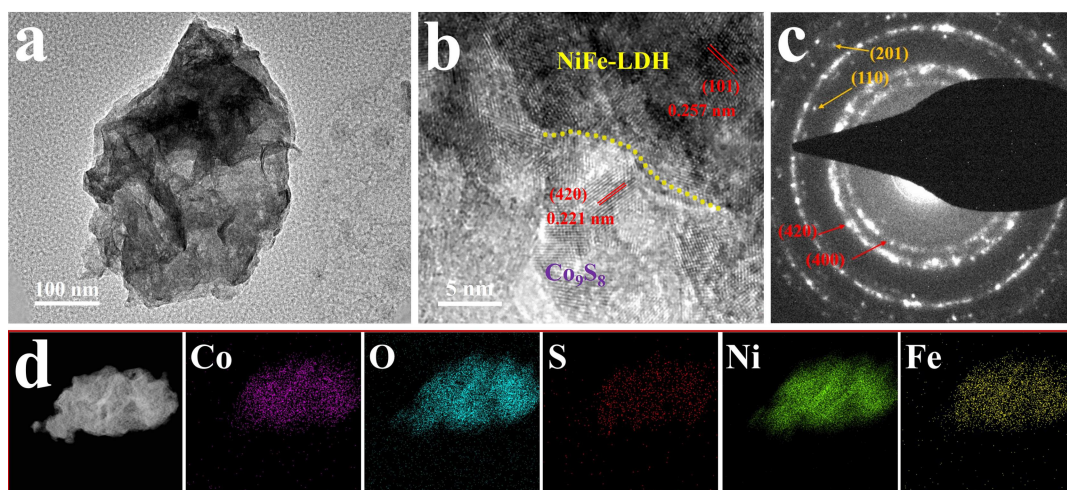

**Figure S14.** (a) TEM, (b) HRTEM, (c) selected area electron diffraction (SAED) images and (d) corresponding element mappings of Co<sub>9</sub>S<sub>8</sub>/Ni<sub>3</sub>S<sub>2</sub>@NiFe-120 after long term OER test.

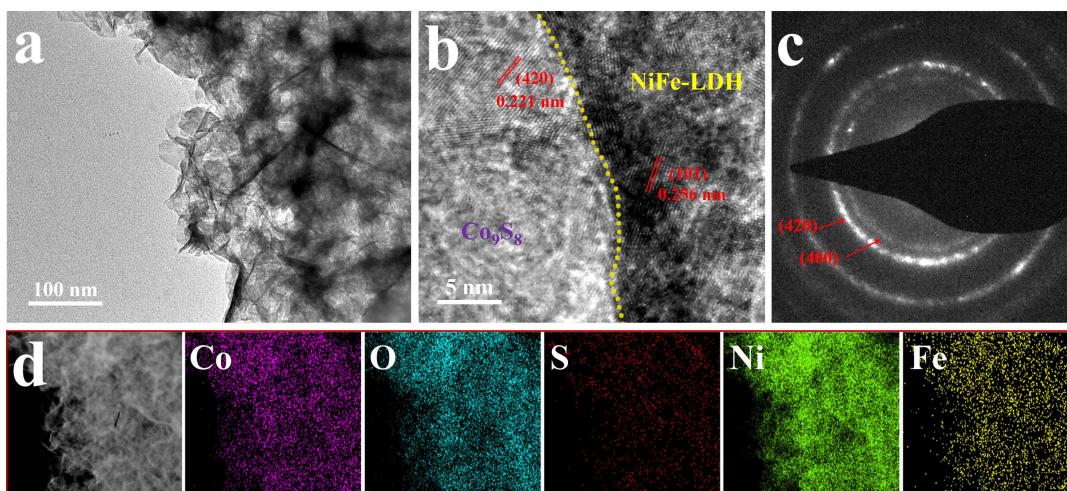

**Figure S15.** (a) TEM, (b) HRTEM, (c) selected area electron diffraction (SAED) images and (d) corresponding element mappings of Co<sub>9</sub>S<sub>8</sub>/Ni<sub>3</sub>S<sub>2</sub>@NiFe-120 after long term HER test.

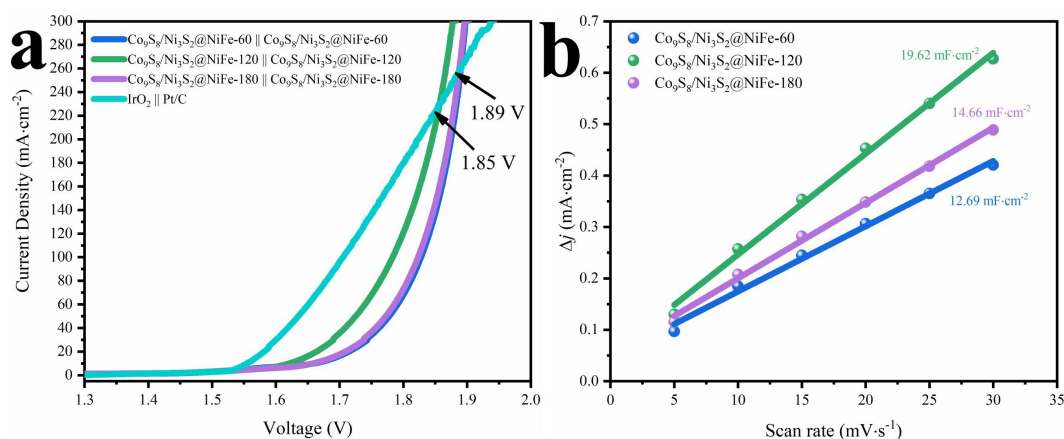

**Figure S16.** The electrocatalytic performance comparison of Co<sub>9</sub>S<sub>8</sub>/Ni<sub>3</sub>S<sub>2</sub>@NiFe-60, Co<sub>9</sub>S<sub>8</sub>/Ni<sub>3</sub>S<sub>2</sub>@NiFe-120 and Co<sub>9</sub>S<sub>8</sub>/Ni<sub>3</sub>S<sub>2</sub>@NiFe-180, (a) LSV, (b) Capacitive current densities as a function of various scan rates for the three catalysts.

**Table S4.** Comparison of several similar electrocatalysts for OER.

| Electrocatalyst                                                                                     | Overpotential<br>(mV) at 10<br>mA·cm <sup>-2</sup> | Overpotential<br>(mV) at 100<br>mA·cm <sup>-2</sup> | Tafel slope<br>(mV·dec <sup>-1</sup> ) | Reference |
|-----------------------------------------------------------------------------------------------------|----------------------------------------------------|-----------------------------------------------------|----------------------------------------|-----------|
| Co <sub>9</sub> S <sub>8</sub> /Ni <sub>3</sub> S <sub>2</sub> @Ni<br>Fe-120                        | 229                                                | 262                                                 | 47.4                                   | This work |
| Ni <sub>3</sub> S <sub>2</sub> /Co <sub>9</sub> S <sub>8</sub>                                      | /                                                  | 340                                                 | 66                                     | 6         |
| Co <sub>1.8</sub> Ni(OH) <sub>5.6</sub> @<br>Co <sub>1.8</sub> NiS <sub>0.4</sub> (OH) <sub>4</sub> | 274                                                | /                                                   | 45.0                                   | 7         |
| Cu@CoP                                                                                              | 270                                                | ≈350                                                | 77.2                                   | 8         |
| Co <sub>9</sub> S <sub>8</sub> /Ni <sub>3</sub> S <sub>2</sub>                                      | 227                                                | ≈280                                                | 46.5                                   | 5         |
| CCS Ni-Co Nw                                                                                        | 302                                                | ≈310                                                | 43.6                                   | 9         |
| Co <sub>3</sub> S <sub>4</sub> @MoS <sub>2</sub>                                                    | 280                                                | ≈320                                                | 43                                     | 10        |
| CoMoNiS-NF-3<br>1                                                                                   | 166                                                | 350                                                 | 58                                     | 11        |
| MoS <sub>2</sub> /Ni <sub>3</sub> S <sub>2</sub><br>(Ni,<br>Fe)S <sub>2</sub> @MoS <sub>2</sub>     | 218<br>270                                         | 290<br>320                                          | 88<br>43.21                            | 12<br>13  |
| Co <sub>1</sub> Mn <sub>1</sub> CH/NF                                                               | /                                                  | 349                                                 | /                                      | 14        |
| Co <sub>9</sub> S <sub>8</sub> /Co <sub>3</sub> O <sub>4</sub>                                      | 250                                                | /                                                   | 73.54                                  | 15        |
| NiS <sub>0.5</sub> Se <sub>0.5</sub>                                                                | 257                                                | 320                                                 | 61                                     | 16        |

**Table S5.** The charge transfer resistance (R<sub>ct</sub>) based on the Nyquist plots for OER.

| Samples                                                                  | R <sub>ct</sub> (Ω·cm <sup>-2</sup> ) |
|--------------------------------------------------------------------------|---------------------------------------|
| CoMo                                                                     | 1.91                                  |
| Co <sub>9</sub> S <sub>8</sub> /Ni <sub>3</sub> S <sub>2</sub>           | 0.95                                  |
| NiFe-120/NF                                                              | 0.45                                  |
| Co <sub>9</sub> S <sub>8</sub> /Ni <sub>3</sub> S <sub>2</sub> @NiFe-60  | 0.51                                  |
| Co <sub>9</sub> S <sub>8</sub> /Ni <sub>3</sub> S <sub>2</sub> @NiFe-120 | 0.32                                  |
| Co <sub>9</sub> S <sub>8</sub> /Ni <sub>3</sub> S <sub>2</sub> @NiFe-180 | 0.48                                  |

**Table S6.** Comparison of several similar electrocatalysts for HER.

| Electrocatalyst                                                          | Overpotential<br>(mV) at 10<br>mA·cm <sup>-2</sup> | Overpotential<br>(mV) at 100<br>mA·cm <sup>-2</sup> | Tafel slope<br>(mV·dec <sup>-1</sup> ) | Reference |
|--------------------------------------------------------------------------|----------------------------------------------------|-----------------------------------------------------|----------------------------------------|-----------|
| Co <sub>9</sub> S <sub>8</sub> /Ni <sub>3</sub> S <sub>2</sub> @NiFe-120 | 151                                                | 259                                                 | 99.1                                   | This work |
| Ni <sub>3</sub> S <sub>2</sub> /Co <sub>9</sub> S <sub>8</sub>           | /                                                  | 269                                                 | 98                                     | 6         |
| Cu@CoP                                                                   | 88                                                 | 150                                                 | 66.1                                   | 8         |
| Co <sub>9</sub> S <sub>8</sub> /Ni <sub>3</sub> S <sub>2</sub>           | 128                                                | ≈230                                                | 97.6                                   | 5         |
| Co <sub>3</sub> S <sub>4</sub> @MoS <sub>2</sub>                         | 136                                                | /                                                   | 74                                     | 10        |
| CoMoNiS-NF-31                                                            | 113                                                | /                                                   | 85                                     | 11        |
| MoS <sub>2</sub> /Ni <sub>3</sub> S <sub>2</sub>                         | 110                                                | /                                                   | 83.1                                   | 12        |
| (Ni, Fe)S <sub>2</sub> @MoS <sub>2</sub>                                 | 130                                                | 240                                                 | 101.22                                 | 13        |
| Co1Mn1CH/NF                                                              | 180                                                | 328                                                 | /                                      | 14        |
| NiS <sub>0.5</sub> Se <sub>0.5</sub>                                     | 70                                                 | 105                                                 | 78                                     | 16        |
| Cu <sub>x</sub> S@NiCo-LDH                                               | 107                                                | ≈190                                                | /                                      | 17        |
| Ni(OH) <sub>2</sub> /MoS <sub>2</sub>                                    | 80                                                 | 155                                                 | 60                                     | 18        |

**Table S7.** The charge transfer resistance (R<sub>ct</sub>) based on the Nyquist plots for HER.

| Samples                                                                  | R <sub>ct</sub> (Ω·cm <sup>-2</sup> ) |
|--------------------------------------------------------------------------|---------------------------------------|
| CoMo                                                                     | 8.45                                  |
| Co <sub>9</sub> S <sub>8</sub> /Ni <sub>3</sub> S <sub>2</sub>           | 4.05                                  |
| NiFe-120/NF                                                              | 13.63                                 |
| Co <sub>9</sub> S <sub>8</sub> /Ni <sub>3</sub> S <sub>2</sub> @NiFe-60  | 2.67                                  |
| Co <sub>9</sub> S <sub>8</sub> /Ni <sub>3</sub> S <sub>2</sub> @NiFe-120 | 1.96                                  |
| Co <sub>9</sub> S <sub>8</sub> /Ni <sub>3</sub> S <sub>2</sub> @NiFe-180 | 2.31                                  |

**Table S8.** Comparison of several similar electrocatalysts for overall water splitting cell.

| Electrocatalyst                                                          | Cell voltage (V) at 10<br>mA·cm <sup>-2</sup> | Reference |
|--------------------------------------------------------------------------|-----------------------------------------------|-----------|
| Co <sub>9</sub> S <sub>8</sub> /Ni <sub>3</sub> S <sub>2</sub> @NiFe-120 | 1.62                                          | This work |
| Ni <sub>3</sub> S <sub>2</sub> /Co <sub>9</sub> S <sub>8</sub>           | 1.55                                          | 6         |
| Cu@CoP                                                                   | 1.65                                          | 8         |
| Co <sub>9</sub> S <sub>8</sub> /Ni <sub>3</sub> S <sub>2</sub>           | 1.64                                          | 5         |
| Co <sub>3</sub> S <sub>4</sub> @MoS <sub>2</sub>                         | 1.58                                          | 10        |
| CoMoNiS-NF-31                                                            | 1.54                                          | 11        |

MoS<sub>2</sub>/Ni<sub>3</sub>S<sub>2</sub>

1.56

12

NiS<sub>0.5</sub>Se<sub>0.5</sub>

1.55

16

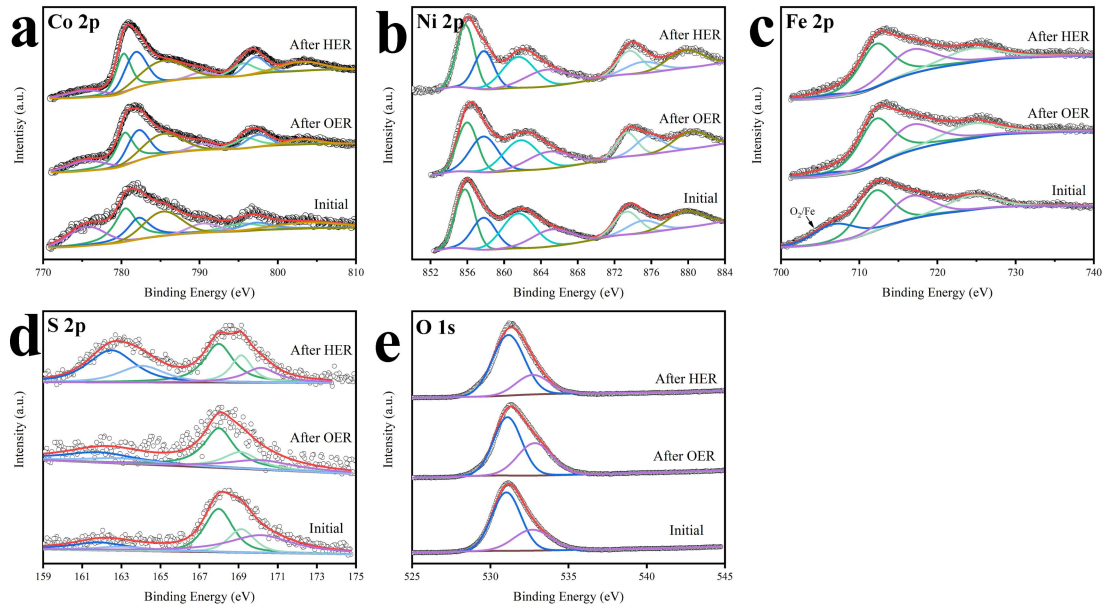

**Figure S17.** XPS spectra of Co<sub>9</sub>S<sub>8</sub>/Ni<sub>3</sub>S<sub>2</sub>@NiFe-120 after 24 h durability tests for OER and HER:

(a) Co 2p, (b) Ni 2p, (c) Fe 2p, (d) S 2p, (e) O 1s region.

For Co, after the water splitting reaction, the ratio of high spin Co<sup>3+</sup> increased and Co<sup>0</sup> reduced, which is beneficial to the charge transfer process<sup>19</sup>, indicating the optimization of electron structure of Co<sub>9</sub>S<sub>8</sub> nanosheets core during the reactions, the Co-O belongs to the intermediate reactant of OER and HER results to the rising valance state, proving the oxidation of Co<sub>9</sub>S<sub>8</sub>. For Fe, the peak at 706.7 eV which represents O<sub>2</sub>/Fe derived from the adsorbed oxygen in air reduced after the reactions, indicating that NiFe-LDHs contributed to the reaction process. Besides, the S-O peaks present strong intensity after HER, corresponding to the S-OH during the reaction.

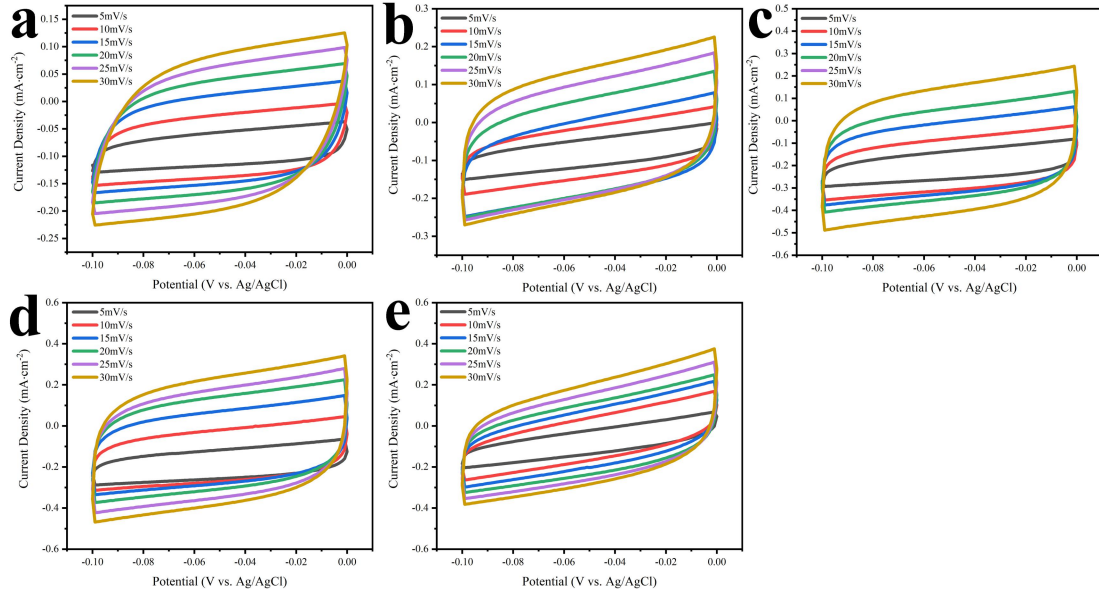

**Figure S18.** CV curves of (a) CoMo, (b) Co<sub>9</sub>S<sub>8</sub>/Ni<sub>3</sub>S<sub>2</sub>, (c) Co<sub>9</sub>S<sub>8</sub>/Ni<sub>3</sub>S<sub>2</sub>@NiFe-60, (d) Co<sub>9</sub>S<sub>8</sub>/Ni<sub>3</sub>S<sub>2</sub>@NiFe-120, (e) Co<sub>9</sub>S<sub>8</sub>/Ni<sub>3</sub>S<sub>2</sub>@NiFe-180 at different scan rates (5, 10, 15, 20, 25, 30 mV·s<sup>-1</sup>) in the non-faradic potential of -0.1~0 V vs. Ag/AgCl.

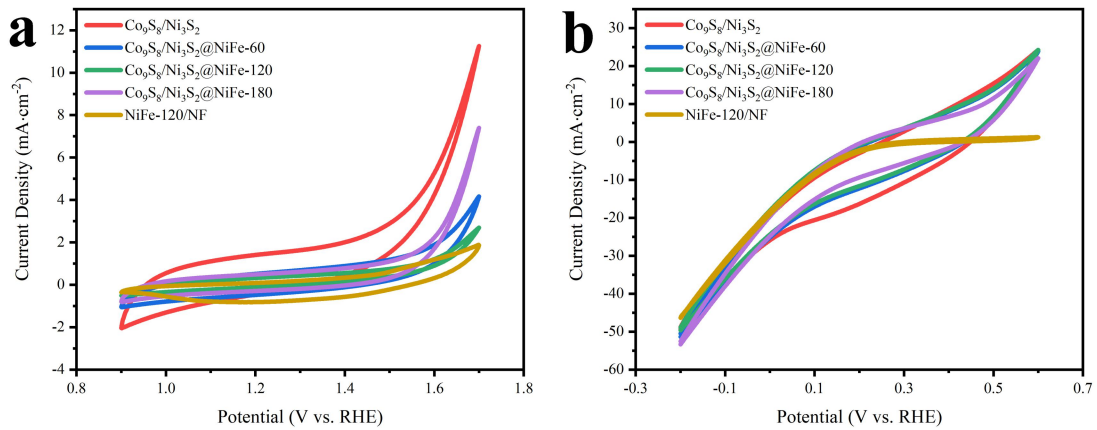

**Figure S19.** CV curves of Co<sub>9</sub>S<sub>8</sub>/Ni<sub>3</sub>S<sub>2</sub>, Co<sub>9</sub>S<sub>8</sub>/Ni<sub>3</sub>S<sub>2</sub>@NiFe-60, Co<sub>9</sub>S<sub>8</sub>/Ni<sub>3</sub>S<sub>2</sub>@NiFe-120, Co<sub>9</sub>S<sub>8</sub>/Ni<sub>3</sub>S<sub>2</sub>@NiFe-180 and NiFe-120/NF at a scan rate of 50 mV·s<sup>-1</sup> in 1.0 M PBS (pH=7) for (a) OER and (b) HER.

In Figure S19, turnover frequency (TOF) was estimated to investigate the intrinsic catalytic activity of the catalysts, its value can be calculated by the equations:  $TOF = (jA)/(4nF)$  for OER and  $TOF = (jA)/(2nF)$  for HER,  $j$  is the current density at a constant overpotential,  $A$  is the area of the working electrode and  $F$  is Faraday's constant ( $96485 \text{ C} \cdot \text{mol}^{-1}$ )<sup>20</sup>,  $n$  is the number of active sites which can be calculated by the equation:  $n = Q/4F$  for OER and  $n = Q/2F$  for HER, where  $Q$  is the integral charges obtained by CV tests at 0.9 ~ 1.7 (-0.2 ~ 0.6) V vs. RHE for OER (HER) in a phosphate buffer solution (pH=7.0)<sup>21</sup>

**Table S9.** TOF values of Co<sub>9</sub>S<sub>8</sub>/Ni<sub>3</sub>S<sub>2</sub>, Co<sub>9</sub>S<sub>8</sub>/Ni<sub>3</sub>S<sub>2</sub>@NiFe-60, Co<sub>9</sub>S<sub>8</sub>/Ni<sub>3</sub>S<sub>2</sub>@NiFe-120, Co<sub>9</sub>S<sub>8</sub>/Ni<sub>3</sub>S<sub>2</sub>@NiFe-180 and NiFe-120/NF at an overpotential of 200 mV.

| TOF(s <sup>-1</sup> ) | Co <sub>9</sub> S <sub>8</sub> /Ni <sub>3</sub> S <sub>2</sub> | Co <sub>9</sub> S <sub>8</sub> /Ni <sub>3</sub> S <sub>2</sub> @NiFe-60 | Co <sub>9</sub> S <sub>8</sub> /Ni <sub>3</sub> S <sub>2</sub> @NiFe-120 | Co <sub>9</sub> S <sub>8</sub> /Ni <sub>3</sub> S <sub>2</sub> @NiFe-180 | NiFe-120/NF |
|-----------------------|----------------------------------------------------------------|-------------------------------------------------------------------------|--------------------------------------------------------------------------|--------------------------------------------------------------------------|-------------|
| <b>OER</b>            | 0.124                                                          | 0.708                                                                   | 1.353                                                                    | 0.465                                                                    | 0.169       |
| <b>HER</b>            | 0.054                                                          | 0.065                                                                   | 0.111                                                                    | 0.101                                                                    | 0.110       |

The Faradic Efficiency was also estimated using the equation:  $FE = V_{\text{exp}}/V_{\text{cal}} = n_{\text{exp}}/n_{\text{cal}}$ , in which  $V_{\text{exp}}$  and  $V_{\text{cal}}$  are the experimental and calculated gas volume (O<sub>2</sub> or H<sub>2</sub>) during the reaction, respectively,  $n_{\text{exp}}$  and  $n_{\text{cal}}$  are the experimental and calculated gas quantity.  $n_{\text{exp}}$  and  $n_{\text{cal}}$  can be calculated using the following equations<sup>22, 23</sup>:

$$n_{\text{exp}} = C_1 n_{\text{gas}}$$

$C_1$ : concentration of gas products (mol·mol<sup>-1</sup>)

$n_{\text{gas}}$ : amount of gas injected to gas chromatography (GC), calculated by  $n_{\text{gas}} = PV_0/RT$ ,  $V_0 = 1$  mL (volume of gas sample),  $P = 1.013 \times 10^5$  Pa,  $R = 8.314$  N·m·K<sup>-1</sup>,  $T = 293.15$  K

$$n_{\text{cal}} = \frac{jt}{ZF}$$

$j$ : the steady-state current, here we choose 50 mA as the testing current

$t$ : reaction time

$Z$ : the number of electrons required to generate on molecule of gas, for H<sub>2</sub>,  $Z = 2$ , and for O<sub>2</sub>,  $Z = 4$ .

$F$ : Faraday's constant (96485 C·mol<sup>-1</sup>)

The results are shown in **Figure S15**.

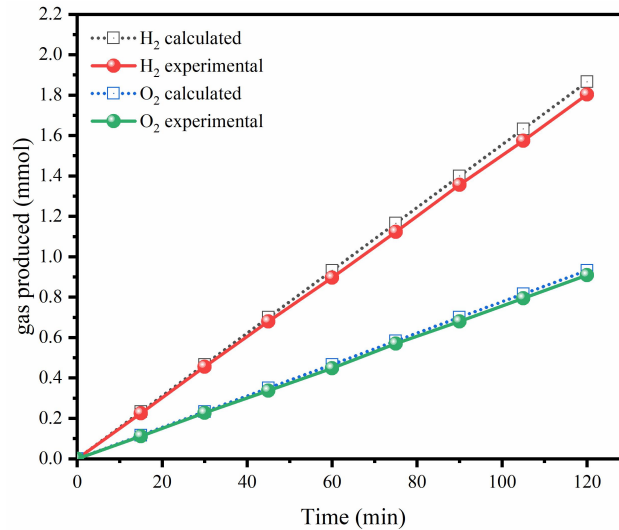

**Figure S20.** The quantity of gas theoretically calculated and experimentally measured versus time employing Co<sub>9</sub>S<sub>8</sub>/Ni<sub>3</sub>S<sub>2</sub>@NiFe-120 catalysts as both anode and cathode at current density of 50

mA·cm<sup>-2</sup>.

## References:

- 1 W. Wang, T. Wang, X. Fan, C. Zhang, J. Hu, H. Chen, Z. Fang, J. Yan and B. Liu, *Chemical Research in Chinese Universities*, 2019, **35**, 261-270.
- 2 K. Li, J. Ma, X. Guan, H. He, M. Wang, G. Zhang, F. Zhang, X. Fan, W. Peng and Y. Li, *Nanoscale*, 2018, **10**, 22173-22179.
- 3 Y. Zhou, J. Zhang, F. Sun, X. Yu, W. Kang and J. Zhang, *Journal of Solid State Chemistry*, 2020, **285**, 121230.
- 4 X. Du, H. Su and X. Zhang, *Journal of Alloys and Compounds*, 2020, **824**, 153965.
- 5 F. Du, L. Shi, Y. Zhang, T. Li, J. Wang, G. Wen, A. Alsaedi, T. Hayat, Y. Zhou and Z. Zou, *Applied Catalysis B: Environmental*, 2019, **253**, 246-252.
- 6 J. Lin, H. Wang, X. Zheng, Y. Du, C. Zhao, J. Qi, J. Cao, W. Fei and J. Feng, *Journal of Power Sources*, 2018, **401**, 329-335.
- 7 B. Wang, C. Tang, H. F. Wang, X. Chen, R. Cao and Q. Zhang, *Adv Mater*, 2019, **31**, e1805658.
- 8 P. Wang, Y. Lin, L. Wan and B. Wang, *Energy & Fuels*, 2020, **34**, 10276-10281.
- 9 S.-H. Bae, J.-E. Kim, H. Randriamahazaka, S.-Y. Moon, J.-Y. Park and I.-K. Oh, *Advanced Energy Materials*, 2017, **7**, 1601492.
- 10 Y. Guo, J. Tang, Z. Wang, Y.-M. Kang, Y. Bando and Y. Yamauchi, *Nano Energy*, 2018, **47**, 494-502.
- 11 Y. Yang, H. Yao, Z. Yu, S. M. Islam, H. He, M. Yuan, Y. Yue, K. Xu, W. Hao, G. Sun, H. Li, S. Ma, P. Zapol and M. G. Kanatzidis, *Journal of the American Chemical Society*, 2019, **141**, 10417-10430.
- 12 J. Zhang, T. Wang, D. Pohl, B. Rellinghaus, R. Dong, S. Liu, X. Zhuang and X. Feng, *Angewandte Chemie International Edition*, 2016, **55**, 6702-6707.
- 13 Y. Liu, S. Jiang, S. Li, L. Zhou, Z. Li, J. Li and M. Shao, *Applied Catalysis B: Environmental*, 2019, **247**, 107-114.
- 14 T. Tang, W.-J. Jiang, S. Niu, N. Liu, H. Luo, Y.-Y. Chen, S.-F. Jin, F. Gao, L.-J. Wan and J.-S. Hu, *Journal of the American Chemical Society*, 2017, **139**, 8320-8328.
- 15 D. Peng, B. Zhang, J. Wu, K. Huang, X. Cao, Y. Lu, Y. Zhang, C. Li and Y. Huang, *ChemCatChem*, 2020, **12**, 2431-2435.
- 16 Y. Wang, X. Li, M. Zhang, Y. Zhou, D. Rao, C. Zhong, J. Zhang, X. Han, W. Hu, Y. Zhang, K. Zaghbi, Y. Wang and Y. Deng, *Advanced Materials*, 2020, DOI: 10.1002/adma.202000231, 2000231.
- 17 X. Deng, X. Kang, M. Li, K. Xiang, C. Wang, Z. Guo, J. Zhang, X.-Z. Fu and J.-L. Luo, *Journal of Materials Chemistry A*, 2020, **8**, 1138-1146.
- 18 B. Zhang, J. Liu, J. Wang, Y. Ruan, X. Ji, K. Xu, C. Chen, H. Wan, L. Miao and J. Jiang, *Nano Energy*, 2017, **37**, 74-80.
- 19 F. Si, C. Tang, Q. Gao, F. Peng, S. Zhang, Y. Fang and S. Yang, *Journal of Materials Chemistry A*, 2020, **8**, 3083-3096.
- 20 R. Yang, Y. Zhou, Y. Xing, D. Li, D. Jiang, M. Chen, W. Shi and S. Yuan, *Applied Catalysis B: Environmental*, 2019, **253**, 131-139.
- 21 H. Liao, X. Guo, Y. Hou, H. Liang, Z. Zhou and H. Yang, *Small*, 2020, **16**, e1905223.
- 22 F. Wei, T. Wang, X. Jiang, Y. Ai, A. Cui, J. Cui, J. Fu, J. Cheng, L. Lei, Y. Hou and S. Liu, *Advanced Functional Materials*, 2020, **30**, 2002092.
- 23 Y. Lin, D. Zhang and Y. Gong, *Applied Surface Science*, 2020, DOI:



10.1016/j.apsusc.2020.148518, 148518.
